# Supplementary material for: What are the treatment remission, response and extent of improvement rates after up to four trials of antidepressant therapies in real-world depressed patients? A reanalysis of the STAR*D study’s patient-level data with fidelity to the original research protocol
Source: PubMed Central journal article supplement — BMJ Open. 2023 Jul 25;13(7):e063095. doi: 10.1136/bmjopen-2022-063095 (PMC10373710; doi:10.1136/bmjopen-2022-063095), 2023-07-25
Supplement: bmjopen-2022-063095supp005.pdf [file bmjopen-2022-063095supp005.pdf]

**Supplementary Table 3:  
Number of Level 2-4 Participants Excluded from our RIAT  
Reanalysis, and the Reasons for their Exclusion, yet Included in STAR\*D**

**Level 2 Treatments**

| Number of Level 2 Participants Excluded from our Reanalysis but Included in STAR*D                                                                                                                                                  | Bup | Sert | Ven | CT | Cit + BUP | Cit + Busp | Cit + CT | Total |
|-------------------------------------------------------------------------------------------------------------------------------------------------------------------------------------------------------------------------------------|-----|------|-----|----|-----------|------------|----------|-------|
| Scored as Remitted at <b>ENTRY</b> into Level 2 yet still included in STAR*D's Level 2 analyses                                                                                                                                     | 22  | 8    | 14  | 7  | 30        | 24         | 4        | 109   |
| Scored as only mildly depressed (HRSD >7 & <14) at entry into Level 1, and therefore excluded from STAR*D's data analysis, yet still treated in Level 1, progressed to Level 2, and then included in STAR*D's Level 2 data analyses | 21  | 15   | 25  | 15 | 20        | 30         | 7        | 133   |
| Scored as Remitted at entry into Level 1 (HRSD ≤ 7), and therefore excluded from STAR*D's data analysis, yet still treated in Level 1 and progressed to Level 2 and then included in STAR*D's Level 2 data analyses                 | 6   | 1    | 4   | 2  | 2         | 2          | 2        | 19    |
| Missing baseline HRSD at entry into Level 1, and therefore excluded from STAR*D's data analysis, yet still treated in Level 1, and progressed to Level 2, and then included in STAR*D's Level 2 data analyses                       | 12  | 18   | 22  | 4  | 16        | 13         | 1        | 86    |
| Number meeting 2 exclusion criterions                                                                                                                                                                                               | 12  | 2    | 7   | 6  | 5         | 8          | 2        | 42    |

Bup=Sustained-release Bupropion; Sert= Sertraline; Ven= Extended-release Venlafaxine;  
CT=Cognitive Therapy; Cit+BUP= Citalopram + Sustained-release Bupropion;  
Cit+Busp=Citalopram + Buspirone; Cit+CT= Citalopram + Cognitive Therapy

**Level 3 Treatments**

|                                                                                                 | Nortriptyline | Mirtazapine | Lithium Augmentation | Triiodothyronine Augmentation | Total |
|-------------------------------------------------------------------------------------------------|---------------|-------------|----------------------|-------------------------------|-------|
| Scored as Remitted at <b>ENTRY</b> into Level 3 yet still included in STAR*D's Level 3 analyses | 4             | 0           | 1                    | 5                             | 10    |
| Scored as only mildly depressed (HRSD >7 &                                                      | 8             | 5           | 3                    | 4                             | 20    |

|                                                                                                                                                                                                                           |   |   |   |   |    |
|---------------------------------------------------------------------------------------------------------------------------------------------------------------------------------------------------------------------------|---|---|---|---|----|
| <14) at entry into Level 1, and therefore excluded from STAR*D's data analysis, yet still treated in Level 1, progressed to Level 2, and then 3 and included in STAR*D's Level 3 data analyses                            |   |   |   |   |    |
| Scored as Remitted at entry into Level 1 (HRSD ≤ 7), and therefore excluded from STAR*D's data analysis, yet still treated in Level 1 and progressed to Level 2 and then 3 and included in STAR*D's Level 3 data analyses | 2 | 1 | 0 | 1 | 4  |
| Missing baseline HRSD at entry into Level 1, and therefore excluded from STAR*D's data analysis, yet still treated in Level 1, and progressed to Level 2, and then level 3 and included in STAR*D's Level 3 data analyses | 7 | 8 | 1 | 7 | 23 |

#### Level 4 Treatments

|                                                                                                                                                                                                                                             | Tranylcypromine | Venlafaxine + Mirtazapine | Total |
|---------------------------------------------------------------------------------------------------------------------------------------------------------------------------------------------------------------------------------------------|-----------------|---------------------------|-------|
| Scored as Remitted at <b>ENTRY</b> into Level 4 yet still included in STAR*D's Level 4 analyses                                                                                                                                             | 5               | 1                         | 6     |
| Scored as only mildly depressed (HRSD >7 & <14) at entry into Level 1, and therefore excluded from STAR*D's data analysis, yet still treated in Level 1, progressed to Level 2, 3 and then 4 and included in STAR*D's Level 4 data analyses | 3               | 1                         | 4     |
| Scored as Remitted at entry into Level 1 (HRSD ≤ 7), and therefore excluded from STAR*D's data analysis, yet still treated in Level 1 and progressed                                                                                        | 0               | 0                         | 0     |

|                                                                                                                                                                                                                             |   |   |   |
|-----------------------------------------------------------------------------------------------------------------------------------------------------------------------------------------------------------------------------|---|---|---|
| to Level 2, then Level 3 and included in STAR*D's Level 4 data analyses                                                                                                                                                     |   |   |   |
| Missing baseline HRSD at entry into Level 1, and therefore excluded from STAR*D's data analysis, yet still treated in Level 1, and progressed to Level 2, and then Level 3 and 4 included in STAR*D's Level 4 data analyses | 5 | 1 | 6 |
