# Supplementary material for: What are the treatment remission, response and extent of improvement rates after up to four trials of antidepressant therapies in real-world depressed patients? A reanalysis of the STAR*D study’s patient-level data with fidelity to the original research protocol
Source: PubMed Central journal article supplement — BMJ Open. 2023 Jul 25;13(7):e063095. doi: 10.1136/bmjopen-2022-063095 (PMC10373710; doi:10.1136/bmjopen-2022-063095), 2023-07-25
Supplement: bmjopen-2022-063095supp006.pdf [file bmjopen-2022-063095supp006.pdf]

**Supplementary Table 4:**  
**Number and Percent of Participants Missing Entry and/or**  
**Exit HRSD Used for Last Observation Carried Forward Analyses**

|                                      | <b>#/(%) with Missing Entry HRSD</b> | <b>#/(%) with Missing Exit HRSD</b> |
|--------------------------------------|--------------------------------------|-------------------------------------|
| <b>Step 1 (N=3,110)</b>              | 0 (0%)                               | 926 (29.8%)                         |
| <b>Step 2 (N=1,134)</b>              | 168 (14.8%)                          | 304 (26.8%)                         |
| <b>Switch strategy (N=620)</b>       | 90 (14.5%)                           | 183 (29.5%)                         |
| Bupropion (N=190)                    | 34                                   | 58                                  |
| Sertraline (N=198)                   | 27                                   | 56                                  |
| Venlafaxine (N=192)                  | 24                                   | 56                                  |
| Cognitive Therapy (N=40)             | 5                                    | 13                                  |
| <b>Augmentation strategy (N=514)</b> | 78 (15.2%)                           | 121 (23.5%)                         |
| Bupropion (N=216)                    | 35                                   | 58                                  |
| Buspirone (N=225)                    | 37                                   | 52                                  |
| Cognitive Therapy (N=73)             | 6                                    | 11                                  |
| <b>Step 3 (N=325)</b>                | 42 (12.9%)                           | 78 (24%)                            |
| <b>Level 2A (N=28)</b>               | 3                                    | 6                                   |
| Bupropion (N=12)                     | 3                                    | 2                                   |
| Venlafaxine (N=16)                   | 0                                    | 4                                   |
| <b>Level 3 (N=297)</b>               | 39                                   | 72                                  |
| <b>Switch strategy (N=186)</b>       | 26                                   | 49                                  |
| Nortriptyline (N=92)                 | 11                                   | 23                                  |
| Mirtazapine (N=94)                   | 15                                   | 26                                  |
| <b>Augmentation strategy (N=111)</b> | 13                                   | 23                                  |
| <b>Lithium (N=58)</b>                | 9                                    | 13                                  |
| Bupropion SR (N=17)                  | 3                                    | 2                                   |
| Citalopram (N=22)                    | 5                                    | 6                                   |
| Sertraline (N=11)                    | 1                                    | 3                                   |
| Venlafaxine XR (N=8)                 | 0                                    | 2                                   |
| <b>T3 (N=53)</b>                     | 4                                    | 10                                  |
| Bupropion SR (N=6)                   | 1                                    | 0                                   |
| Citalopram (N=26)                    | 1                                    | 7                                   |
| Sertraline (N=8)                     | 1                                    | 1                                   |
| Venlafaxine XR (N=13)                | 1                                    | 2                                   |

|                                      |                   |                   |
|--------------------------------------|-------------------|-------------------|
| <b>Step 4 (N=106)</b>                | <b>15 (14.2%)</b> | <b>22 (20.8%)</b> |
| Level 3 (N=16)                       | 3                 | 3                 |
| Tranlycypromine (N=43)               | 7                 | 10                |
| Venlafaxine<br>XR/mirtazapine (N=47) | 5                 | 9                 |
