# Supplementary material for: What are the treatment remission, response and extent of improvement rates after up to four trials of antidepressant therapies in real-world depressed patients? A reanalysis of the STAR*D study’s patient-level data with fidelity to the original research protocol
Source: PubMed Central journal article supplement — BMJ Open. 2023 Jul 25;13(7):e063095. doi: 10.1136/bmjopen-2022-063095 (PMC10373710; doi:10.1136/bmjopen-2022-063095), 2023-07-25
Supplement: bmjopen-2022-063095supp007.pdf [file bmjopen-2022-063095supp007.pdf]

**Supplementary Table 5: Baseline Demographic and Clinical Features by Treatment Step**

|                                        | Treatment Step <sup>a</sup> |           |                  |           |                |           |                |           |
|----------------------------------------|-----------------------------|-----------|------------------|-----------|----------------|-----------|----------------|-----------|
|                                        | Step 1<br>(N=3,110)         |           | Step 2 (N=1,134) |           | Step 3 (N=325) |           | Step 4 (N=106) |           |
| <b>Demographic Features</b>            |                             |           |                  |           |                |           |                |           |
|                                        | <b>Mean</b>                 | <b>SD</b> | <b>Mean</b>      | <b>SD</b> | <b>Mean</b>    | <b>SD</b> | <b>Mean</b>    | <b>SD</b> |
| Age                                    | 41.0                        | 13.0      | 42.0             | 12.6      | 44.1           | 12.0      | 46.9           | 11.0      |
| Education (years)                      | 13.6                        | 3.2       | 13.2             | 3.3       | 12.8           | 3.1       | 12.6           | 2.3       |
| Monthly household income               | 2,289                       | 2,732     | 1,744            | 1,539     | 1,470          | 1,383     | 1,003          | 887       |
|                                        | <b>N</b>                    | <b>%</b>  | <b>N</b>         | <b>%</b>  | <b>N</b>       | <b>%</b>  | <b>N</b>       | <b>%</b>  |
| Female                                 | 1,469                       | 74.6      | 502              | 73.1      | 113            | 65.3      | 34             | 65.4      |
| Race                                   |                             |           |                  |           |                |           |                |           |
| White                                  | 2,328                       | 74.9      | 870              | 76.7      | 259            | 79.7      | 86             | 81.1      |
| Black                                  | 333                         | 10.7      | 115              | 10.1      | 29             | 8.9       | 7              | 6.6       |
| Other                                  | 449                         | 14.4      | 149              | 13.1      | 37             | 11.4      | 13             | 12.3      |
| Hispanic                               | 402                         | 12.9      | 139              | 12.3      | 45             | 13.8      | 16             | 15.1      |
| Employment status                      |                             |           |                  |           |                |           |                |           |
| Employed                               | 975                         | 58.7      | 314              | 54.2      | 69             | 46.9      | 19             | 43.2      |
| Unemployed                             | 612                         | 36.9      | 243              | 42.0      | 72             | 49.0      | 24             | 54.5      |
| Retired                                | 73                          | 4.4       | 22               | 3.8       | 6              | 4.1       | 1              | 2.3       |
| Medical insurance                      |                             |           |                  |           |                |           |                |           |
| Private                                | 848                         | 52.2      | 254              | 44.5      | 52             | 36.6      | 14             | 31.8      |
| Public                                 | 282                         | 17.4      | 109              | 19.2      | 30             | 21.4      | 10             | 23.3      |
| None                                   | 534                         | 33.2      | 223              | 39.3      | 60             | 43.2      | 20             | 46.5      |
| Marital status                         |                             |           |                  |           |                |           |                |           |
| Single                                 | 475                         | 28.6      | 171              | 29.5      | 40             | 27.2      | 10             | 22.7      |
| Married/cohabiting                     | 716                         | 43.1      | 238              | 41.0      | 61             | 41.5      | 18             | 40.9      |
| Divorce/separated                      | 429                         | 25.8      | 155              | 26.7      | 42             | 28.6      | 14             | 31.8      |
| Widowed                                | 41                          | 2.5       | 16               | 2.8       | 4              | 2.7       | 2              | 4.5       |
| <b>Clinical Features</b>               | <b>N</b>                    | <b>%</b>  | <b>N</b>         | <b>%</b>  | <b>N</b>       | <b>%</b>  | <b>N</b>       | <b>%</b>  |
| First episode occurrence before age 18 | 1,200                       | 39.0      | 436              | 38.8      | 120            | 37.0      | 41             | 38.7      |
| Recurrent depression                   | 1,940                       | 66.8      | 718              | 68.3      | 188            | 63.3      | 59             | 60.8      |
| Family history of depression           | 1,694                       | 55.4      | 609              | 54.9      | 165            | 51.7      | 58             | 54.7      |

|                                                                             |             |           |             |           |             |           |             |           |
|-----------------------------------------------------------------------------|-------------|-----------|-------------|-----------|-------------|-----------|-------------|-----------|
| Duration of current episode $\geq$ 2 years                                  | 787         | 25.6      | 311         | 27.7      | 88          | 27.2      | 34          | 32.1      |
|                                                                             | <b>Mean</b> | <b>SD</b> | <b>Mean</b> | <b>SD</b> | <b>Mean</b> | <b>SD</b> | <b>Mean</b> | <b>SD</b> |
| Age at first episode (years)                                                | 24.9        | 14.5      | 24.7        | 14.2      | 25.9        | 14.6      | 25.9        | 14.3      |
| Illness duration (years)                                                    | 16.1        | 13.5      | 17.2        | 13.7      | 18.2        | 14.1      | 21.0        | 14.9      |
| Number of episodes                                                          | 4.4         | 9.7       | 4.9         | 11.1      | 4.4         | 10.3      | 5.0         | 12.1      |
| Duration of current episode (months)                                        | 25.9        | 52.0      | 28.1        | 58.8      | 32.1        | 68.5      | 45.9        | 82.0      |
| Median duration of current episode (months)                                 | 8.3         |           | 8.7         |           | 9.5         |           | 10.1        |           |
| Quality of Life and Enjoyment Satisfaction Questionnaire score <sup>b</sup> | 39.1        | 14.3      | 36.5        | 13.6      | 33.7        | 13.5      | 31.6        | 12.8      |
| SF-12 Mental <sup>c</sup>                                                   | 25.6        | 8.1       | 25.0        | 7.7       | 24.4        | 7.7       | 24.0        | 7.5       |
| SF-12 Physical <sup>c</sup>                                                 | 48.6        | 12.1      | 47.0        | 12.4      | 44.5        | 12.1      | 43.8        | 12.3      |
| Work and Social Adjustment Scale score <sup>d</sup>                         | 25.0        | 8.7       | 26.3        | 8.2       | 28.3        | 7.7       | 29.4        | 7.0       |
| HRSD <sub>17</sub> score                                                    | 21.9        | 5.2       | 22.5        | 5.2       | 23.4        | 5.2       | 23.9        | 5.4       |
| IDS-C <sub>30</sub> score <sup>e</sup>                                      | 39.1        | 9.6       | 40.6        | 9.7       | 42.6        | 9.4       | 43.6        | 9.8       |
| QIDS-IVR score <sup>f</sup>                                                 | 16.9        | 3.3       | 17.3        | 3.3       | 17.9        | 3.0       | 18.3        | 3.1       |
| Cumulative Illness Rating Scale                                             |             |           |             |           |             |           |             |           |
| Categories endorsed                                                         | 2.5         | 1.5       | 2.6         | 1.6       | 2.8         | 1.6       | 3.1         | 1.6       |
| Total score                                                                 | 4.7         | 3.9       | 5.1         | 4.0       | 5.8         | 4.5       | 6.2         | 4.3       |
| Severity score                                                              | 1.8         | 0.8       | 1.8         | 0.8       | 2.0         | 0.9       | 2.0         | 0.7       |
|                                                                             | <b>N</b>    | <b>%</b>  | <b>N</b>    | <b>%</b>  | <b>N</b>    | <b>%</b>  | <b>N</b>    | <b>%</b>  |
| Psychiatric Diagnostic Screening Questionnaire                              |             |           |             |           |             |           |             |           |
| Agoraphobia                                                                 | 559         | 18.2      | 240         | 21.4      | 89          | 27.5      | 32          | 30.2      |
| Alcohol abuse/dependence                                                    | 371         | 12.0      | 136         | 12.1      | 36          | 11.1      | 8           | 7.5       |
| Bulimia                                                                     | 607         | 19.7      | 232         | 20.6      | 67          | 20.7      | 20          | 18.9      |

|                                                 |     |      |     |      |     |      |    |      |
|-------------------------------------------------|-----|------|-----|------|-----|------|----|------|
| Drug abuse/dependence                           | 234 | 7.6  | 80  | 7.1  | 21  | 6.5  | 7  | 6.6  |
| Generalized anxiety disorder                    | 736 | 23.9 | 290 | 25.8 | 94  | 29.0 | 36 | 34.0 |
| Hypochondriasis                                 | 336 | 10.9 | 139 | 12.4 | 45  | 13.9 | 14 | 13.2 |
| Obsessive-compulsive disorder                   | 723 | 23.5 | 265 | 23.6 | 97  | 29.9 | 31 | 29.2 |
| Panic disorder                                  | 422 | 13.7 | 183 | 16.3 | 65  | 20.1 | 21 | 19.8 |
| Posttraumatic stress disorder                   | 387 | 12.6 | 172 | 15.3 | 55  | 17.0 | 16 | 15.1 |
| Social phobia                                   | 963 | 31.3 | 379 | 33.7 | 117 | 36.1 | 35 | 33.0 |
| Somatiform disorder                             | 284 | 9.2  | 105 | 9.3  | 35  | 10.8 | 9  | 8.5  |
| Number of axis I comorbid psychiatric disorders |     |      |     |      |     |      |    |      |
| 0                                               | 606 | 19.7 | 190 | 16.9 | 48  | 14.8 | 12 | 11.3 |
| 1                                               | 740 | 24.0 | 257 | 22.9 | 68  | 21.0 | 23 | 21.7 |
| 2                                               | 577 | 18.7 | 217 | 19.3 | 62  | 19.1 | 25 | 23.6 |
| 3                                               | 363 | 11.8 | 139 | 12.4 | 42  | 13.0 | 14 | 13.2 |
| 4+                                              | 793 | 25.8 | 321 | 28.6 | 104 | 32.1 | 32 | 30.2 |

<sup>a</sup> Sums do not always equal N due to missing values. Percentages are based on available data.

<sup>b</sup> Integrated voice response (IVR) administered version of the Quality-of-Life Enjoyment and Satisfaction Questionnaire assessing participants' global rate of satisfaction. Higher scores (range=0–100) represent greater life enjoyment and satisfaction.

<sup>c</sup> IVR-administered version of the SF-12 assessing perceived mental and physical health status. Two subscales (physical health factor and mental health) range from 0 to 100— higher scores indicate better functioning with a population norm for each score of 50.

<sup>d</sup> IVR-administered version of the Work and Social Adjustment Scale. Scores between 10 and 20 are associated with significant functional impairment while scores above 20 suggest moderate to severe functional impairment.

<sup>e</sup> Inventory of Depressive Symptomatology administered telephonically.

<sup>f</sup> IVR-administered version of the QIDS.
