# Supplementary figures and images for: What are the treatment remission, response and extent of improvement rates after up to four trials of antidepressant therapies in real-world depressed patients? A reanalysis of the STAR*D study’s patient-level data with fidelity to the original research protocol
Source: PubMed Central journal article supplement — BMJ Open. 2023 Jul 25;13(7):e063095. doi: 10.1136/bmjopen-2022-063095 (PMC10373710; doi:10.1136/bmjopen-2022-063095), 2023-07-25

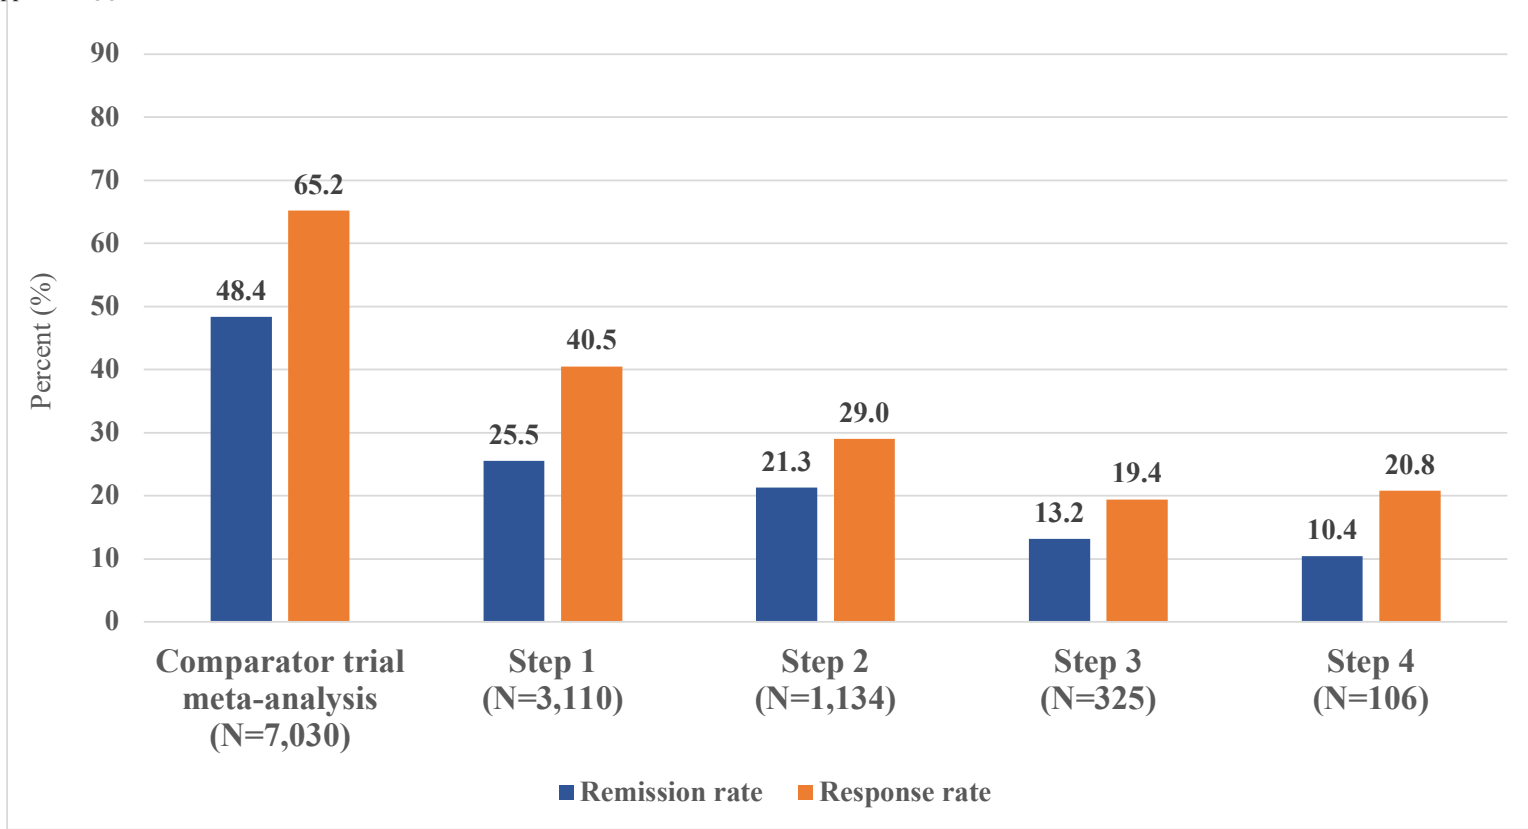

Supplement: bmjopen-2022-063095supp001.pdf [file bmjopen-2022-063095supp001.pdf]

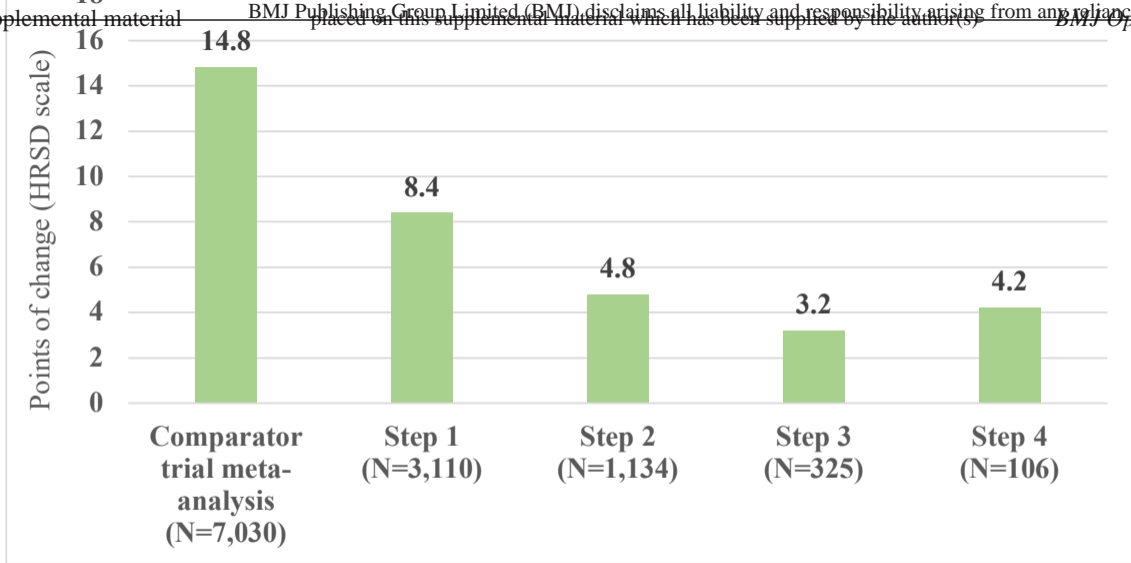

Supplement: bmjopen-2022-063095supp002.pdf [file bmjopen-2022-063095supp002.pdf]
